# Supplementary material for: Prevalence of Malaria and Leptospirosis Co-Infection among Febrile Patients: A Systematic Review and Meta-Analysis
Source: Trop Med Infect Dis. 2021 Jul 3;6(3):122. doi: 10.3390/tropicalmed6030122 (PMC8293407; doi:10.3390/tropicalmed6030122)
Supplement: Supplementary file 1 [file tropicalmed-06-00122-s001.zip › Table S1. Search term.pdf]

# **Prevalence of malaria and leptospirosis co-infection among febrile patients: a systematic review and meta-analysis**

Polrat Wilairatana<sup>1</sup>, Wanida Mala<sup>2</sup>, Wiyada Kwanhian Klangbud<sup>2</sup>, Kwuntida Uthaisar Kotepui<sup>2</sup>, Pongruj Rattaprasert<sup>3</sup>, Manas Kotepui<sup>2\*</sup>

<sup>1</sup>Department of Clinical Tropical Medicine, Faculty of Tropical Medicine, Mahidol University, Bangkok, Thailand

<sup>2</sup>Medical Technology, School of Allied Health Sciences, Walailak University, Tha Sala, Nakhon Si Thammarat, Thailand

<sup>3</sup>Department of Protozoa, Faculty of Tropical Medicine, Mahidol University, Bangkok, Thailand

## **\*Corresponding author**

Manas Kotepui; [manas.ko@wu.ac.th](mailto:manas.ko@wu.ac.th), Tel.: +66954392469

Polrat Wilairatana; [polrat.wil@mahidol.ac.th](mailto:polrat.wil@mahidol.ac.th)

Wanida Mala; [wanida.ma@wu.ac.th](mailto:wanida.ma@wu.ac.th)

Wiyada Kwanhian Klangbud; [kwiyada@wu.ac.th](mailto:kwiyada@wu.ac.th)

Pongruj Rattaprasert; [pongruj.rat@mahidol.ac.th](mailto:pongruj.rat@mahidol.ac.th)

Kwuntida Uthaisar Kotepui; [kwuntida.ut@wu.ac.th](mailto:kwuntida.ut@wu.ac.th)

**Table S1. Search term**

| <b>Databases</b> | <b>Search terms</b>                                                                                                                    | <b>Date</b> |
|------------------|----------------------------------------------------------------------------------------------------------------------------------------|-------------|
| MEDLINE          | (Malaria OR plasmodium) AND (Leptospira OR Leptospirosis OR Stuttgart OR Mud OR Rice-Field OR "Rice Field" OR Cane-Cutter OR Canicola) | 18 May 2021 |

|                    |                                                                                                                                                                                                                          |             |
|--------------------|--------------------------------------------------------------------------------------------------------------------------------------------------------------------------------------------------------------------------|-------------|
|                    | Search results: 148                                                                                                                                                                                                      |             |
| Scopus             | (Malaria OR plasmodium) AND (Leptospira OR<br>Leptospirosis OR Stuttgart OR Mud OR Rice-Field<br>OR "Rice Field" OR Cane-Cutter OR Canicola)<br><br>Search option: Title, abstract, keywords<br><br>Search results: 1232 | 18 May 2021 |
| ISI Web of Science | (Malaria OR plasmodium) AND (Leptospira OR<br>Leptospirosis OR Stuttgart OR Mud OR Rice-Field<br>OR "Rice Field" OR Cane-Cutter OR Canicola)<br><br>Search option: All fields<br><br>Search results: 596                 | 18 May 2021 |
