# Supplementary material for: Prevalence of Malaria and Leptospirosis Co-Infection among Febrile Patients: A Systematic Review and Meta-Analysis
Source: Trop Med Infect Dis. 2021 Jul 3;6(3):122. doi: 10.3390/tropicalmed6030122 (PMC8293407; doi:10.3390/tropicalmed6030122)
Supplement: Supplementary file 1 [file tropicalmed-06-00122-s001.zip › Table S2. Quality of the included studies.pdf]

# **Prevalence of malaria and leptospirosis co-infection among febrile patients: a systematic review and meta-analysis**

Polrat Wilairatana<sup>1</sup>, Wanida Mala<sup>2</sup>, Wiyada Kwanhian Klangbud<sup>2</sup>, Kwuntida Uthaisar Kotepui<sup>2</sup>, Pongruj Rattaprasert<sup>3</sup>, Manas Kotepui<sup>2\*</sup>

<sup>1</sup>Department of Clinical Tropical Medicine, Faculty of Tropical Medicine, Mahidol University, Bangkok, Thailand

<sup>2</sup>Medical Technology, School of Allied Health Sciences, Walailak University, Tha Sala, Nakhon Si Thammarat, Thailand

<sup>3</sup>Department of Protozoa, Faculty of Tropical Medicine, Mahidol University, Bangkok, Thailand

## **\*Corresponding author**

Manas Kotepui; [manas.ko@wu.ac.th](mailto:manas.ko@wu.ac.th), Tel.: +66954392469

Polrat Wilairatana; [polrat.wil@mahidol.ac.th](mailto:polrat.wil@mahidol.ac.th)

Wanida Mala; [wanida.ma@wu.ac.th](mailto:wanida.ma@wu.ac.th)

Wiyada Kwanhian Klangbud; [kwiayada@wu.ac.th](mailto:kwiayada@wu.ac.th)

Pongruj Rattaprasert; [pongruj.rat@mahidol.ac.th](mailto:pongruj.rat@mahidol.ac.th)

Kwuntida Uthaisar Kotepui; [kwuntida.ut@wu.ac.th](mailto:kwuntida.ut@wu.ac.th)

| No. | Authors                      | Eligibility criteria | Study subjects and the setting | Exposure measured in a valid and reliable way 'gold standard' | A specified diagnosis or definition | Confounding factors | Dealing with confounding factors | Outcomes measured in a valid and reliable way | Appropriate statistical analysis | Scores (8) | Quality (high, moderate, low) |
|-----|------------------------------|----------------------|--------------------------------|---------------------------------------------------------------|-------------------------------------|---------------------|----------------------------------|-----------------------------------------------|----------------------------------|------------|-------------------------------|
| 1   | Chipwaza et al., 2015        | Yes                  | Yes                            | Yes                                                           | Yes                                 | No                  | NA                               | Yes                                           | Yes                              | 7          | High                          |
| 2   | Ellis et al., 2006           | Yes                  | Yes                            | Yes                                                           | Yes                                 | No                  | NA                               | Yes                                           | Yes                              | 7          | High                          |
| 3   | Forero-Peña et al., 2021     | Yes                  | Yes                            | No                                                            | Yes                                 | No                  | NA                               | Yes                                           | Yes                              | 6          | Moderate                      |
| 4   | Lindo et al., 2013           | Yes                  | Yes                            | No                                                            | Yes                                 | No                  | NA                               | Yes                                           | Yes                              | 6          | Moderate                      |
| 5   | Mandage et al., 2020         | Yes                  | No                             | Yes                                                           | Yes                                 | No                  | NA                               | Yes                                           | Yes                              | 6          | Moderate                      |
| 6   | Mattar et al., 2017          | Yes                  | Yes                            | Yes                                                           | Yes                                 | No                  | NA                               | Yes                                           | Yes                              | 7          | High                          |
| 7   | Mehta et al., 2018           | Yes                  | Yes                            | No                                                            | Yes                                 | No                  | NA                               | Yes                                           | Yes                              | 6          | Moderate                      |
| 8   | Mueller et al., 2014         | Yes                  | Yes                            | Yes                                                           | Yes                                 | No                  | NA                               | Yes                                           | Yes                              | 7          | High                          |
| 9   | Raja et al., 2016            | Yes                  | Yes                            | No                                                            | Yes                                 | No                  | NA                               | Yes                                           | Yes                              | 6          | Moderate                      |
| 10  | Rao et al., 2020             | Yes                  | Yes                            | Yes                                                           | Yes                                 | No                  | NA                               | Yes                                           | Yes                              | 7          | High                          |
| 11  | Sharma et al., 2014          | Yes                  | Yes                            | No                                                            | Yes                                 | No                  | NA                               | Yes                                           | Yes                              | 6          | Moderate                      |
| 12  | Singhsilarak et al., 2006    | Yes                  | No                             | Yes                                                           | Yes                                 | No                  | NA                               | Yes                                           | Yes                              | 6          | Moderate                      |
| 13  | Swoboda et al., 2014         | Yes                  | Yes                            | No                                                            | Yes                                 | No                  | NA                               | Yes                                           | Yes                              | 6          | Moderate                      |
| 14  | Wongsrichanalai et al., 2003 | Yes                  | Yes                            | Yes                                                           | Yes                                 | No                  | NA                               | Yes                                           | Yes                              | 7          | High                          |
| 15  | Zaki et al., 2010            | Yes                  | Yes                            | No                                                            | Yes                                 | No                  | NA                               | Yes                                           | Yes                              | 6          | Moderate                      |

NA, Not Applicable
